# Supplementary material for: Las experiencias de hombres con vasectomía en el Servicio de Salud Pública de Brasil
Source: HighWire-hosted journal article supplement (doi:10.1136/sextrans-2011-050454), 2005-01-01
Supplement: sextrans-2011-050454_Russian_translation.pdf [file sextrans-2011-050454_Russian_translation.pdf]

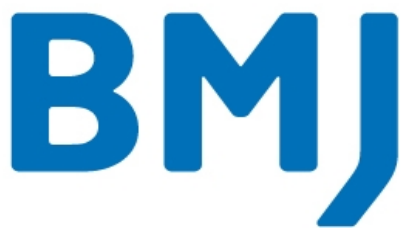

Sexually  
Transmitted  
Infections

sti.bmj.com

**Использование SMS-оповещений и мотивационных выплат с целью повышения частоты обследования на *Chlamydia trachomatis* для выявления реинфицирования**

Сандра Гей Даунинг, Коллетт Кэшман, Хизер МакНами, Дэбби Пенни, Даррен Б Расселл, Маргарет Е Хеллард

*Sex Transm Infect* 2013 89: 16-19 опубликовано на сайте 23 июня 2012 года  
идентификатор: 10.1136/sextrans-2011-050454

Источник статьи:

<http://sti.bmj.com/content/89/1/16.full.html>

Источники литературы:

Авторы данной статьи ссылаются на 14 статей, 3 из которых можно скачать бесплатно на сайте:  
<http://sti.bmj.com/content/89/1/16.full.html#ref-list-1>

Адрес для получения разрешений:

<http://journals.bmj.com/cgi/reprintform>

Адрес для заказа репринтов:

<http://journals.bmj.com/cgi/reprintform>

Адрес для оформления подписки:

<http://group.bmj.com/subscribe/>

**Translated by the International Union against Sexually Transmitted Infections**

BMJ Publishing Group Limited takes no responsibility for the accuracy of the translation from the published English original and is not liable for any errors which may occur.

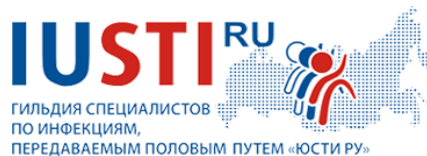

## Использование SMS-оповещений и мотивационных выплат с целью повышения частоты обследования на *Chlamydia trachomatis* для выявления реинфицирования

Сандра Гей Даунинг<sup>1,2</sup>, Коллетт Кэшман<sup>1</sup>, Хизер МакНами<sup>1</sup>, Дэбби Пенни<sup>1</sup>, Даррен Б. Расселл<sup>1</sup>, Мергарет Е. Хеллард<sup>2</sup>

<sup>1</sup> Служба сексуального здоровья населения Кернса, Кернс, Квинсленд, Австралия  
<sup>2</sup> Центр здоровья населения, Институт Бёрнета, Мельбурн, Виктория, Австралия

### Адрес для

### корреспонденции:

Сандра Гей Даунинг, Служба Сексуального Здоровья Населения Кернса, ПЯ 902, Кернс 4870, Квинсленд, Австралия (Sandra Gaye Downing, Cairns Sexual Health Service, PO Box 902, Cairns 4870, Queensland, Australia); [sandra\\_downing@health.qld.gov.au](mailto:sandra_downing@health.qld.gov.au)

Принято в печать 26 мая 2012, опубликовано в системе Online First 23 Июня 2012

### Основные положения.

**Введение.** Пациенты, получающие лечение по поводу урогенитальной хламидийной инфекции, являются группой риска для повторного инфицирования. Для обследования через 3-4 месяца после окончания лечения в Службу сексуального здоровья населения Кернса обращаются 8% пациентов.

Системы напоминания о необходимости повторного обследования в учреждении нет. В данном исследовании изучали эффективность использования рассылки коротких сообщений (SMS) в сочетании с мотивационными выплатами и без таковых с целью повышения частоты повторного обследования.

**Материалы и методы.** Пациенты, подходящие для участия в исследовании, подписывали информированное согласие, после чего случайным образом распределялись по трём группам. Пациентам 1-ой группы (контрольной) врач предлагал пройти повторное обследование через 3-4 месяца так же, как и в рутинной практике. Пациенты 2-ой группы дополнительно получали SMS-напоминание через 10-12 недель после окончания лечения. Пациенты 3-ей группы, помимо рекомендации врача, получали SMS-напоминание с указанием на возможность получения материального вознаграждения при посещении клиники.

**Результаты.** В группы 1 и 2 было набрано по 32 пациента, в 3-ю группу – 30 пациентов. Всего было отправлено 62 SMS, из которых 13 (21%) не были доставлены адресату. Частота повторного обследования составила 6.3%, 28.1% и 26.7% в группах 1, 2 и 3 соответственно.

**Выводы.** SMS-оповещения в сочетании с мотивационными выплатами и без таковых повышали частоту повторного обследования среди пациентов с урогенитальной хламидийной инфекцией. С другой стороны, полученная частота повторного обследования далека от оптимальной. Кроме того, показано, что большая часть сообщений остаётся недоставленной адресатам. Это позволяет предположить, что использование исключительного данного метода не позволит добиться оптимальных показателей повторного обследования, а для достижения оптимального уровня в исследуемой популяции придётся использовать несколько способов оповещения одновременно.

## **ВВЕДЕНИЕ.**

Инфекция, вызываемая *Chlamydia trachomatis*, - самая распространённая инфекция на территории Австралии. В 2010 году зарегистрировано 74305 новых случаев заболевания<sup>1</sup>. В течение последних 10 лет уровень заболеваемости как мужчин, так и женщин увеличился более, чем в 3 раза<sup>1</sup>. В отсутствие лечения хламидийная инфекция может приводить к развитию осложнений, наиболее значимыми из которых являются воспалительные заболевания органов малого таза (ВЗОМТ), синдром хронической тазовой боли (СХТБ), внематочная беременность и бесплодие<sup>2</sup>. Реинфицирование повышает риск развития ВЗОМТ и внематочной беременности у женщин<sup>3</sup>; у мужчин, имеющих секс с мужчинами, повышается частота сероконверсии в отношении ВИЧ<sup>4</sup>. Доказано, что наличие хламидийной инфекции в анамнезе повышает риск последующего инфицирования как мужчин, так и женщин<sup>5-8</sup>. В связи с этим в Австралийских клинических рекомендациях указано, что повторное тестирование необходимо проводить всем пациентам с урогенитальным хламидиозом через 3 месяца после установления диагноза.<sup>9,10</sup> Данных, отражающих частоту повторного тестирования, недостаточно, однако в недавнем сообщении Австралийского Сотрудничества по Усиленному Дозорному Эпиднадзору за Хламидийной инфекцией (Australian Collaboration for Chlamydia Enhanced Sentinel Surveillance - ACCESS) показано, что за 4 года работы сети по сексуальному здоровью общая частота повторного тестирования составила 14.1%.<sup>11</sup> По данным сети по планированию семьи (также относится к ACCESS) за 2008-2009гг.<sup>12</sup> частота повторного тестирования среди пациентов 16-29 лет составила 12.7%. Служба Сексуального Здоровья Населения Кернса (Cairns Sexual Health Service -CSHS) предусматривает рекомендацию врача относительно повторного тестирования через 3-4 месяца при назначении лечения. При этом в CSHS нет функционирующей системы обзвона пациентов или других инструментов для оповещения.

Служба коротких сообщений (SMS) позволяет отправлять сообщения на мобильные телефоны пациентов. SMS могут являться эффективным инструментом для напоминания о необходимости посещения врача, а также для сокращения числа «невозвратов» пациентов в амбулаторные учреждения.<sup>13,14</sup> Кроме того, показано, что мотивационные выплаты стимулируют пациента к соблюдению предписаний врача.<sup>15</sup> Однако в единственном исследовании, посвященном финансовой мотивации пациентов, было показано, что данный подход не позволяет получить ощутимый эффект для повышения частоты повторного обследования на *Chlamydia trachomatis*.<sup>16</sup> С другой стороны, полученные результаты могут быть связаны с длительным промежутком времени от момента включения пациента в исследование (когда с ним обсуждается выплата) до момента необходимого повторного обследования. В данном исследовании проводилась оценка эффективности рассылки SMS-напоминаний в сочетании с мотивационными выплатами и без таковых для повышения частоты повторного обследования пациентов CSHS с урогенитальной хламидийной инфекцией.

## **МАТЕРИАЛЫ И МЕТОДЫ.**

К участию в исследовании приглашались пациенты CSHS, обратившиеся в клинику по поводу лечения хламидийной инфекции или жалоб на эрозивно-язвенные поражения гениталий, вагинальные выделения, влагалищные кровотечения, тазовые боли, дизурию, или по поводу обнаружения *Chlamydia trachomatis* у полового партнёра. Обязательными условиями для участия в исследовании были следующие: возраст не менее 16 лет, проживание в Кернсе в течение последующих 6 месяцев, наличие мобильного телефона, желание получить напоминание о необходимости обследования. Пациенты с ВИЧ-инфекцией исключались из исследования, т.к. необходимость регулярного посещения клиники по поводу лечения ВИЧ могла

повлиять на частоту повторного обследования. После включения пациента старший исследователь проводил рандомизацию пациентов с использованием последовательности чисел 1,2 и 3, расположенных случайным образом (рандомизация проводилась с использованием программного обеспечения Excel). Результат рандомизации не сообщался ни врачу, включившему пациента в исследование, ни пациенту. Пациенты 1-ой группы получили от врача стандартные рекомендации по повторному обследованию через 3-4 месяца. Пациенты 2-ой группы дополнительно получали SMS-напоминание через 10-12 недель после окончания лечения, а пациенты 3-ей группы получали рекомендации врача, а также SMS-напоминание, в котором предлагалось получить вознаграждение 10\$ при визите в клинику с целью повторного обследования. Включенные в исследование пациенты, у которых не была обнаружена *Chlamydia trachomatis*, были в дальнейшем исключены из исследования. В памяти мобильного телефона клиники были сохранены SMS с шаблонами напоминаний: «3 месяца истекли. Посетите клинику для обследования или позвоните по телефону 40506205 для того, чтобы записаться к врачу» и «3 месяца истекли. Посетите клинику для обследования или позвоните по телефону 40506205 для того, чтобы записаться к врачу, и получите вознаграждение 10\$». SMS-напоминания рассылали по понедельникам (или по вторникам, если на понедельник приходился государственный праздник) всем участникам исследования, которым следовало направить напоминание на данной неделе. Для всех сообщений получали отчёт о доставке. Отчёт о том, что сообщение не может быть доставлено, получали через 7 дней регулярных автоматических попыток доставить сообщение абоненту. Пациентам предоставлялся выбор, каким образом будет проводиться обследование: они могли заранее записаться на консультацию или прийти непосредственно в клинику, где им предлагался осмотр

медицинским персоналом или возможность сдать анализ мочи для исследования (организация получения биологического материала осуществлялась работниками регистратуры) без осмотра. Пациент считался обследованным повторно в случае, если обследование произвели в сроке 10-16 недель от окончания лечения. В течение 2008 года в CSHS было диагностировано 120 случаев хламидийной инфекции среди пациентов, постоянно проживающих в Кернсе и окрестностях. Частота повторного тестирования через 3-4 месяца после окончания лечения составила 8%. Расчёт размера выборки, необходимой для данного исследования, производили с учётом указанных данных. Получили, что каждая группа должна включать 30 человек, чтобы выявить абсолютное различие в 10% по частоте повторного обследования между группами 1 и 2; 1 и 3 (мощность выборки 80%,  $\alpha=5\%$ ). Для сравнения характеристик пациентов в группах и выявления ассоциации с количеством недоставленных сообщений использовали критерий  $\chi^2$ . Для каждой группы рассчитывали частоту повторного тестирования, а затем использовали критерий  $\chi^2$  (двухсторонний точный тест Фишера) для установления достоверности полученных различий. Проводили как анализ всех рандомизированных пациентов (изначально включённых в исследование), так и анализ «по протоколу» (только те пациенты, которые полностью завершили протокол исследования. Для проведения статистического анализа использовали программное обеспечение Stata (версия 10). Протокол исследования одобрен Комитетом по Этике Проведения Исследований на Людях Службы Здравоохранения Кернса и Прилегающих Территорий.

## РЕЗУЛЬТАТЫ.

К участию в исследовании был приглашен 161 пациент, обратившийся в клинику с января 2010 по март 2011 года. У 94 из них была обнаружена хламидийная инфекция; за этими пациентами проводили наблюдение в течение обозначенного периода. Распределение по группам: по 32

пациента в 1-ой и 2-ой группах, 30 пациентов в 3-ей группе. Возраст 59 (62.8%) пациентов составил <25 лет; 28.7% пациентов являлись Аборигенами и Островитянами Торресова Пролива (АОТП); количество мужчин и

женщин, принимающих участие в исследовании, было практически одинаковым. Статистически достоверных различий по характеристикам изученных групп получено не было (Таблица 1).

**Таблица 1.** Характеристики пациентов в исследуемых группах.

|               | <b>Все пациенты<br/>(n=94)<br/>n(%)</b> | <b>1-ая группа<br/>(n=32)<br/>n(%)</b> | <b>2-ая группа<br/>(n=32)<br/>n(%)</b> | <b>3-я группа<br/>(n=30)<br/>n(%)</b> | <b>Значение p</b> |
|---------------|-----------------------------------------|----------------------------------------|----------------------------------------|---------------------------------------|-------------------|
| Пол           |                                         |                                        |                                        |                                       |                   |
| Мужчины       | 46 (48.9)                               | 14 (43.8)                              | 16 (50.0)                              | 16 (53.3)                             | 0.744             |
| Женщины       | 48 (51.1)                               | 18 (56.3)                              | 16 (50.0)                              | 14 (46.7)                             |                   |
| Возраст       |                                         |                                        |                                        |                                       |                   |
| <25           | 59 (62.8)                               | 20 (62.5)                              | 18 (56.3)                              | 21 (70.0)                             | 0.534             |
| ≥25           | 35 (37.2)                               | 12 (37.5)                              | 14 (43.8)                              | 9 (30.0)                              |                   |
| Происхождение |                                         |                                        |                                        |                                       |                   |
| АОТП          | 27 (28.7)                               | 10 (31.3)                              | 9 (28.1)                               | 8 (26.7)                              | 0.387             |
| Не-АОТП       | 61 (64.9)                               | 20 (62.5)                              | 19 (59.4)                              | 22 (73.3)                             |                   |
| Неизвестно    | 6 (6.4)                                 | 2 (6.3)                                | 4 (12.5)                               | 0 (0)                                 |                   |

Всего было отправлено 62 SMS-напоминания, 13 (21.0%) из которых не были доставлены. Семь из 13 участников (53.8%), которым не были доставлены SMS, были Аборигенами и Островитянами Торресова Пролива (связь статистически достоверна,  $p=0.047$ ). Связи между возрастом или полом и количеством недоставленных сообщений обнаружено не было.

Частота повторного обследования на *Chlamydia trachomatis* в 1-ой группе

(контрольной) составила 6.3% (при анализе всех рандомизированных пациентов), во 2-ой группе (SMS-напоминание) – 28.1%, в 3-ей группе (SMS-напоминание и мотивационные выплаты) – 26.7% (Таблица 2). Из 19 повторно обследованных пациентов у 3 (15.9%) была диагностирована хламидийная инфекция. Различия в частоте повторного обращения пациентов в группе 1 и группах 2 ( $p=0.043$ ) и 3 (0.040) были статистически значимыми.

**Таблица 2.** Сравнение частоты повторного обследования в исследуемых группах (анализ всех рандомизированных пациентов)

|                                                     | <b>Не обследованы<br/>повторно<br/>n</b> | <b>Обследованы<br/>повторно<br/>n</b> | <b>Обследованы<br/>повторно<br/>% (95% ДИ)</b> | <b>Значение p</b> |
|-----------------------------------------------------|------------------------------------------|---------------------------------------|------------------------------------------------|-------------------|
| 1-ая группа,<br>контроль (n=32)                     | 30                                       | 2                                     | 6.3 (0.8-20.8)                                 |                   |
| 2-ая группа, SMS-<br>напоминания<br>(n=32)          | 23                                       | 9                                     | 28.1 (13.8-46.6)                               | 0.043             |
| 3-я группа, SMS-<br>напоминания +<br>выплата (n=30) | 22                                       | 8                                     | 26.67 (12.3-45.9)                              | 0.040             |

При анализе «по протоколу» (после исключения пациентов, которые не прошли повторное обследование через 10-16 недель после лечения, которым SMS-напоминание не было доставлено, а также тех, кто прошёл обследование до получения напоминания) установили, что ни один из

пациентов 1-ой группы не был обследован повторно, из групп 2 и 3 были обследованы 5 (22.7%) и 7 (29.2%) пациентов соответственно (Таблица 3, рисунок 1). Из 12 обследованных повторно пациентов у 2 (16.6%) была диагностирована хламидийная инфекция. Достоверные

различия в частоте повторного 2-ой группой ( $p=0.010$ ) и 1-ой и 3-ей тестирования были получены между 1-ой и группой ( $p=0.002$ ).

**Таблица 3.** Сравнение частоты повторного обследования в исследуемых группах (пациенты, которые полностью завершили протокол исследования)

|                                              | Не обследованы повторно<br>n | Обследованы повторно<br>n | Обследованы повторно<br>% (95% ДИ) | Значение p |
|----------------------------------------------|------------------------------|---------------------------|------------------------------------|------------|
| 1-ая группа, контроль (n=30)                 | 30                           | 0                         | 0                                  |            |
| 2-ая группа, SMS-напоминания (n=22)          | 17                           | 5                         | 22.7 (8.8-43.4)                    | 0.010      |
| 3-я группа, SMS-напоминания + выплата (n=24) | 17                           | 7                         | 29.17 (12.6-51.1)                  | 0.002      |

**Рисунок 1.** Распределение пациентов

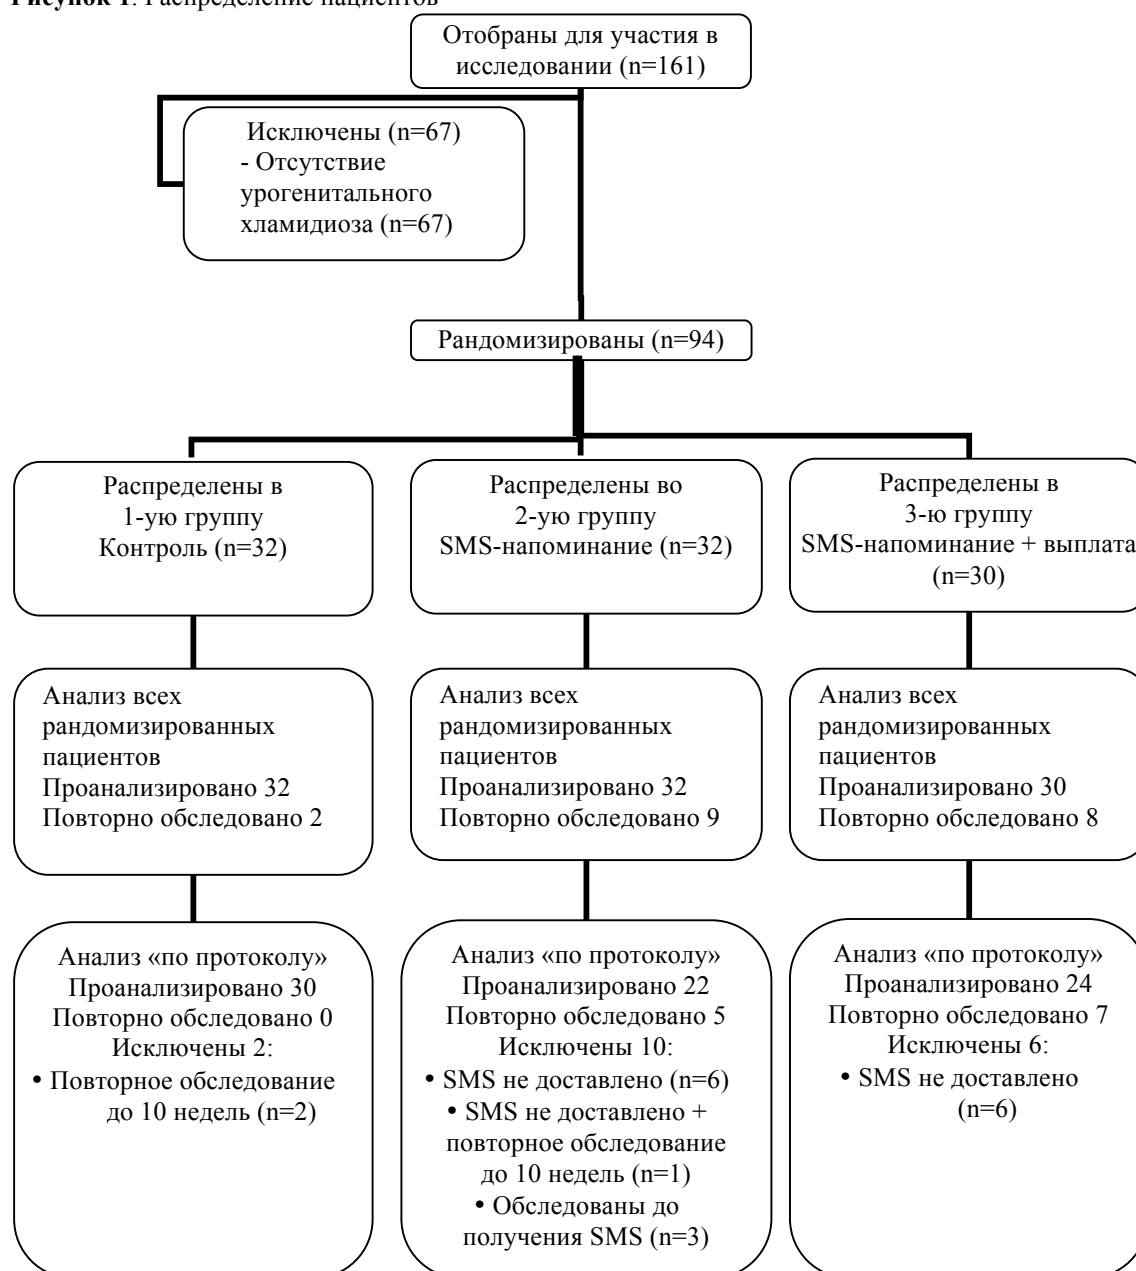

## ОБСУЖДЕНИЕ.

В проведенном исследовании впервые оценивали эффективность SMS-напоминаний в сочетании с мотивационными выплатами и без таковых для повышения частоты повторного тестирования после установления диагноза хламидийной инфекции на территории Австралии. Показано, что рассылка SMS-напоминаний как с мотивационными выплатами, так и без таковых повышает частоту повторного обследования в сравнении с группой пациентов, не получавших SMS. Другой важной находкой в данном исследовании стало то, что, несмотря на успешность изучаемой тактики, 21% сообщений не были доставлены пациентам.

SMS-напоминания с выплатами и без повышали частоту повторного тестирования до 26.7% и 28.1% соответственно. Другие способы повышения частоты обращения для повторного обследования, изученные к настоящему моменту, также обладали умеренной эффективностью.<sup>16-18</sup> Paneth-Pollak и соавт.<sup>18</sup> показали, что напоминания при помощи рассылки почтовых карточек повышали частоту повторного тестирования с 7.7% до 14.1%. В исследовании Malotte и соавт.<sup>16</sup> изучали несколько подходов и пришли к выводу, что телефонный звонок – наиболее эффективный метод привлечения пациентов для повторного исследования и также получили, что финансовое вознаграждение не повышало обращаемость пациентов. Однако несмотря на то, что в данном исследовании не показано преимуществ SMS-напоминаний и финансового вознаграждения в сравнении с SMS-напоминаниями без вознаграждения, к этим результатам стоит относиться критически в связи с небольшим объемом выборки. Самой высокой частоты повторного тестирования удалось добиться Sparks и соавт.<sup>17</sup> Исследователи обзванивали пациентов через 10 недель после окончания лечения и предлагали выбор: обратиться в клинику или получить по почте набор для самостоятельного

забора материала и отправить обратно в клинику. Стоит обратить внимание на то, что объем выборки был небольшим, а включение пациентов в исследование требовало телефонного звонка. Важно, что исследователи не смогли дозвониться 42% пациентов, которые потенциально могли быть включены в исследование.

В исследовании, посвященном изучению частоты повторного тестирования в 2004-2008гг (проведено организацией ACCESS), не показано существенных изменений в частоте изучаемого показателя,<sup>11</sup> что свидетельствует о невысокой эффективности изученных мероприятий. Частота повторного обследования в 19 клиниках, участвовавших в исследовании, варьировала в широких пределах: от 5.7% до 32.0%. Необходимо провести более глубокий анализ для выяснения причин таких различий: зависят ли они от характеристик пациентов, обратившихся в конкретную клинику, или от мероприятий, которые проводили те или иные клиники. Стоит учитывать, что в исследовании ACCESS оценивалась частота повторного обследования всех пациентов клиники, в то время как в нашем исследовании были особые критерии включения и исключения, что затрудняет прямое сравнение результатов, полученных в двух исследованиях.

Среди полученных результатов особенно стоит выделить то, что 21% пациентов не удалось доставить SMS-напоминания. При этом их телефоны были в рабочем состоянии на момент включения в исследование (10-12 недель до рассылки SMS). Если телефон абонента выключен, находится вне зоны действия сети, или же папка с входящими сообщениями переполнена, сообщение не может быть доставлено абоненту в данный момент. Однако, принимая во внимание, что система отправки сообщений осуществляла автоматические повторные попытки отправки сообщения в течение установленного времени, наиболее вероятно, что телефонный номер был аннулирован или временно заблокирован. Причины для аннулирования или

блокировки телефона: задолженность по счёту, потеря/кража телефона, смена сотового оператора, разрядка аккумулятора.

Несмотря на то, что количество участников исследования было невелико, удалось выявить взаимосвязь между невозможностью доставки SMS и принадлежностью пациента к АОТП. Причины такой зависимости установить не удалось, однако стоит учитывать данную особенность, т.к. АОТП являются группой риска развития урогенитального хламидиоза. Для понимания, будет ли эффективной для повышения частоты повторного обследования рассылка подобных напоминаний, необходима более детальная информация об использовании мобильных телефонов в целевых группах пациентов.

Несмотря на успех проведённых мероприятий, ни в одной из исследованных групп не удалось добиться частоты повторного обследования выше 28.1%. Стоит учитывать, что в подобных условиях вне научного исследования данный процент мог быть ещё ниже, т.к. врачи могли не уделять должного внимания вопросу повторного обследования. Дополнительные мероприятия (обзвон пациентов, рассылка электронных писем или почтовых карточек; отправка наборов для самостоятельного получения материала и пересылки по почте без посещения клиники) могут повысить частоту повторного обследования. Следует также рассмотреть возможность выбора метода напоминания самим пациентом с учётом конкретных обстоятельств. Также следует оценить вклад мотивационного консультирования и особого выделения необходимости повторного тестирования во время беседы с врачом при назначении лечения.

Данное исследование имеет определённые ограничения. Так, большой объём выборки

позволил бы выявить ассоциации между характеристиками пациентов в группах, а также различия в частоте повторного тестирования во 2-ой (SMS-напоминания) и 3-ей (SMS-напоминания и выплаты) группах. Несмотря на то, что во всех группах получены сходные характеристики пациентов, стоит учитывать, что на результат мог повлиять небольшой объём выборки и количественные различия пациентов в группах. Кроме того, за время исследования изменилось расположение клиники CSHS, что могло повлиять на частоту возвращения пациентов для повторного тестирования. В довершении всего, стоит учитывать, что в исследовании был получен неожиданно высокий процент недоставленных сообщений.

Система напоминаний с использованием SMS является эффективной для связи с группами риска с целью проведения повторного тестирования и может являться одним элементом из комплекса проводимых мероприятий в современной медицине. Для выработки окончательной стратегии необходимо провести более масштабное исследование с целью установления вклада мотивационных выплат в сочетании с SMS-напоминаниями на уровень повторного обследования пациентов. В то же время, высокий процент недоставленных сообщений указывает на то, что только данное мероприятие не позволит достичь оптимальной частоты повторного обследования. Кроме того, эффективность рассылки SMS следует установить на различных выборках пациентов. Неудовлетворительная частота повторного обследования, полученная при проведении различных мероприятий и в предыдущих исследованиях, указывает на необходимость сочетания нескольких путей воздействия для достижения желаемого результата в данной группе пациентов.

#### Основные положения

- SMS-напоминания в сочетании с мотивационными выплатами существенно повышают частоту повторного обследования; несмотря на это, показатели остаются ниже оптимальных.
- Существенная часть SMS – напоминаний не была доставлена абонентам, поэтому ещё предстоит установить эффективность данного мероприятия в разных выборках пациентов



**Благодарность:** Мы благодарим сотрудников Службы Сексуального Здоровья Населения Кернса за их энтузиазм и ответственный подход к выполнению исследования, Тима Спельмана из Института Бёрнета за помощь в статистической обработке данных, а также всех участников исследования. Маргарет Хеллард получает поддержку Сообщества Ведущих Научных Сотрудников Национального Совета по Охране Здоровья и Медицинским Исследованиям.

**Вклад авторов:** Сандра Гей Даунинг: (1) Идея исследования, дизайн, анализ и интерпретация данных, (2) написание статьи, (3) окончательное утверждение статьи перед публикацией. Коллетт Кэшман: (1) обработка данных, (2) правка статьи, (3) окончательное утверждение статьи перед публикацией. Хизер МакНами: (1) обработка данных, (2) правка статьи, (3) окончательное утверждение статьи перед публикацией. Дэбби ПенниЖ (1) обработка данных, (2) правка статьи, (3) окончательное утверждение статьи перед публикацией. Даррен Б Расселл: (1) Идея исследования, дизайн, обработка данных, (2) правка статьи, (3) окончательное утверждение статьи перед публикацией. Мергарет Е Хеллард: (1) Идея

#### **СПИСОК ЛИТЕРАТУРЫ:**

1. The Kirby Institute. HIV, Viral Hepatitis and Sexually Transmitted Infection in Australia Annual Surveillance Report 2011. Sydney, NSW: The Kirby Institute, the University of New South Wales, 2011.
2. Low N, Egger M, Sterne JA, et al. Incidence of severe reproductive tract complications associated with diagnosed genital chlamydial infection: the Uppsala Women's Cohort Study. *Sex Transm Infect* 2006;82:212e18.
3. Hillis SD, Owens LM, Marchbanks PA, et al. Recurrent chlamydial infections increase the risks of hospitalization for ectopic pregnancy and pelvic inflammatory disease. *Am J Obstet Gynecol* 1997;176:103e7.
4. Berstein KT, Marcus JL, Nieri G, et al. Rectal gonorrhoea and chlamydia reinfection is associated with increased risk of HIV seroconversion. *J Acquir Immune Defic Syndr* 2010;53:537e43.
5. Dunne EF, Chapin JB, Rietmeijer CA, et al. Rate and predictors of repeat Chlamydia trachomatis infection among men. *Sex Transm Dis* 2008;35(11 Suppl):S40e4.
6. Rietmeijer CA, Van Bemmelen R, Judson FN, et al. Incidence and repeat infection rates of Chlamydia trachomatis among male and female patients in an STD clinic: implications for screening and rescreening. *Sex Transm Dis* 2002;29:65e72.
7. Scott Lamontagne D, Baster K, Emmett L, et al. Incidence and reinfection rates of genital chlamydial infection among women aged 16-24 years attending general practice, family planning and genitourinary medicine clinics in England: a prospective cohort study by the Chlamydia Recall Study Advisory Group. *Sex Transm Infect* 2007;83:292e303.

исследования, дизайн, анализ и интерпретация данных, (2) правка статьи, (3) окончательное утверждение статьи перед публикацией.

**Финансирование:** Совет Квинсленда по Сестринскому Делу предоставил средства для проведения данного исследования.

**Конфликт интересов:** Не заявлен

**Информированное согласие пациентов:** Получено

**Одобрение этического комитета:** Протокол исследования одобрен Комитетом по Этике Проведения Исследований на Людях Службы Здравоохранения Кернса и Прилегающих Территорий

**Исходные данные и рецензирование:** Не проверялись; рецензия статьи независимым экспертом.

**Право на использование данных:** Полученные данные хранятся в Службе Сексуального Здоровья Населения Кернса. Все авторы имеют доступ к данным через автора, ответственного за переписку.

8. Whittington WL, Kent C, Kissinger P, et al. Determinants of persistent and recurrent Chlamydia trachomatis infection in young women: results of a multicenter cohort study. *Sex Transm Dis* 2001;28:117e23.
9. Australian Chapter of Sexual Health Medicine. National Management Guidelines for Sexually Transmissible Infections. Melbourne: Royal Australasian College of Physicians, 2008.
10. Sexually Transmissible Infection in Gay Men Action Group. Sexually Transmitted Infection Testing Guidelines for Men Who Have Sex With Men (STIGMA Guidelines). Sydney: Australasian Chapter of Sexual Health Medicine, 2008.
11. Guy R, Wand H, Franklin N, et al. Re-testing for chlamydia at sexual health services in Australia, 2004-08. *Sex Health* 2011;8:242e7.
12. Bowring A, Gouillou M, Guy R, et al. Chlamydia Repeat Testing and Positivity Rates at General Practices and Family Planning Clinics in Australia 2008e2009. Canberra, ACT, Australia: Australasian Sexual Health Conference, 2011.
13. Geraghty M, Glynn F, Amin M, et al. Patient mobile telephone 'text' reminder: a novel way to reduce non-attendance at the ENT out-patient clinic. *J Laryngol Otol* 2008;122:296e8.
14. Milne RG, Horne M, Torsney B. SMS reminders in the UK national health service: an evaluation of its impact on "no-shows" at hospital out-patient clinics. *Health Care Manage Rev* 2006;31:130e6.
15. Giuffrida A, Torgerson DJ. Should we pay the patient? Review of financial incentives to enhance patient compliance. *BMJ* 1997;315:703e7.
16. Malotte CK, Ledsky R, Hogben M, et al. Comparison of methods to increase repeat testing in persons treated for gonorrhoea and/or chlamydia at

public sexually transmitted disease clinics. *Sex Transm Dis* 2004;31:637e42.

17. Sparks R, Helmers JR, Handsfield HH, et al. Rescreening for gonorrhea and chlamydial infection through the mail: a randomized trial. *Sex Transm Dis* 2004;31:113e16.

18. Paneth-Pollak R, Klingler EJ, Blank S, et al. The elephant never forgets; piloting a chlamydia and gonorrhea retesting reminder postcard in an STD clinic setting. *Sex Transm Dis* 2010;37:365e8.
