# Supplementary material for: Las experiencias de hombres con vasectomía en el Servicio de Salud Pública de Brasil
Source: HighWire-hosted journal article supplement (doi:10.1136/sextrans-2011-050454), 2005-01-01
Supplement: sextrans-2011-050454_Spanish_abstract.pdf [file sextrans-2011-050454_Spanish_abstract.pdf]

## **SPANISH ABSTRACT**

**Como incrementar la tasa de pruebas de reinfección por clamidia utilizando mensajes recordatorios SMS e incentivos**

### **RESUMEN**

**Antecedentes:** Aquellos pacientes a los que se les diagnostica y se les da tratamiento debido a infecciones por *Chlamydia trachomatis* constituyen un grupo reconocido de alto riesgo para una siguiente infección. Se estima que un 8% de los pacientes que se trata por clamidia en el Cairns Sexual Health Service (Servicio de Salud Sexual Cairns) regresan para una nueva prueba dentro del periodo recomendado de 3-4 meses. No hay un sistema de nueva cita o recordatorio. Este estudio evalúa la eficacia de utilizar recordatorios mediante mensajes de texto (SMS) con y sin incentivos económicos para incrementar las tasas de pruebas de reinfección.

**Métodos:** Los pacientes elegibles que consintieron a las pruebas fueron asignados aleatoriamente a uno de tres grupos. El Grupo 1 (control) recibió el acostumbrado consejo del médico para tomar una nueva prueba por reinfección en 3-4 meses. El Grupo 2 recibió el consejo acostumbrado y un recordatorio SMS a las 10-12 semanas post-tratamiento. El Grupo 3 recibió el consejo acostumbrado y el recordatorio SMS, que le ofreció además un incentivo económico por asistir a la clínica.

**Resultados:** Se reclutó 32 participantes en los grupos 1 y 2 y 30 participantes en el grupo 3. Se envió 62 recordatorios SMS de los cuales 13 (21.0%) fueron reportados como no entregados. Las tasas de nueva prueba por reinfección fueron 6.3%, 28.1% y 26.7% para los grupos 1, 2 y 3, respectivamente.

**Conclusiones:** Los SMS con o sin incentivo económico aumentaron las tasas de nuevas pruebas por reinfección en nuestros pacientes a los que se diagnosticó y trató por clamidia. No obstante, las pruebas por reinfección alcanzaron un nivel menor al ideal, y la alta tasa de recordatorios SMS que no fueron entregados sugieren que esta intervención por sí sola no logrará las tasas de pruebas por reinfección que se desea y que se requerirá que una gama de estrategias que incrementen las pruebas por reinfección dentro de esta población.

**A Spanish version of the full text of this article is available to members of IUSTI Latin America/ALACITS via the members' area of the ALACITS website at [www.alacits.org](http://www.alacits.org).**
